# Supplementary material for: Catalytic mechanism study on manganese oxide in the catalytic supercritical water oxidation of nitrobenzene
Source: Royal Society of Chemistry journal article supplement (doi:10.1039/c5ra04322k), 2015-01-01
Supplement: c5ra04322k1.pdf [file c5ra04322k1.pdf]

## Supporting Information

According to the GC-MS data of the reaction products, the analysis results are listed in Table S1 and Table S2.

**Table S1 The Intermediates for SCWO of Nitrobenzene**

| Formula                                                                             | Name               | Molecular Weight | Residence Time(min) |
|-------------------------------------------------------------------------------------|--------------------|------------------|---------------------|
| 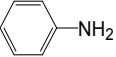   | aniline            | 93               | 2.75                |
|    | o-nitrophenol      | 139              | 4.05                |
|   | hydroquinone       | 110              | 5.30                |
|  | 1,3 dinitrobenzene | 168              | 6.88                |
|  | m-nitrophenol      | 139              | 7.05                |
|  | p-nitrophenol      | 139              | 7.55                |

**Table S2 The Intermediates for CSCWO of Nitrobenzene**

| Formula                                                                             | Name               | Molecular Weight | Residence Time(min) |
|-------------------------------------------------------------------------------------|--------------------|------------------|---------------------|
| 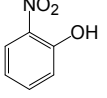 | o-nitrophenol      | 139              | 4.04                |
|  | 1,3 dinitrobenzene | 168              | 6.88                |
|  | m-nitrophenol      | 139              | 7.05                |

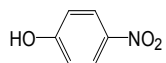

p-nitrophenol

139

7.55

---
